# Supplementary material for: JNK-Dependent cJun Phosphorylation Mitigates TGFβ- and EGF-Induced Pre-Malignant Breast Cancer Cell Invasion by Suppressing AP-1-Mediated Transcriptional Responses
Source: PubMed Central journal article supplement (PMC6952832; doi:10.3390/cells8121481), 2019-11-21
Supplement: cells-08-01481-s001.pdf [file cells-08-01481-s001.pdf]

Supplementary Figure S1

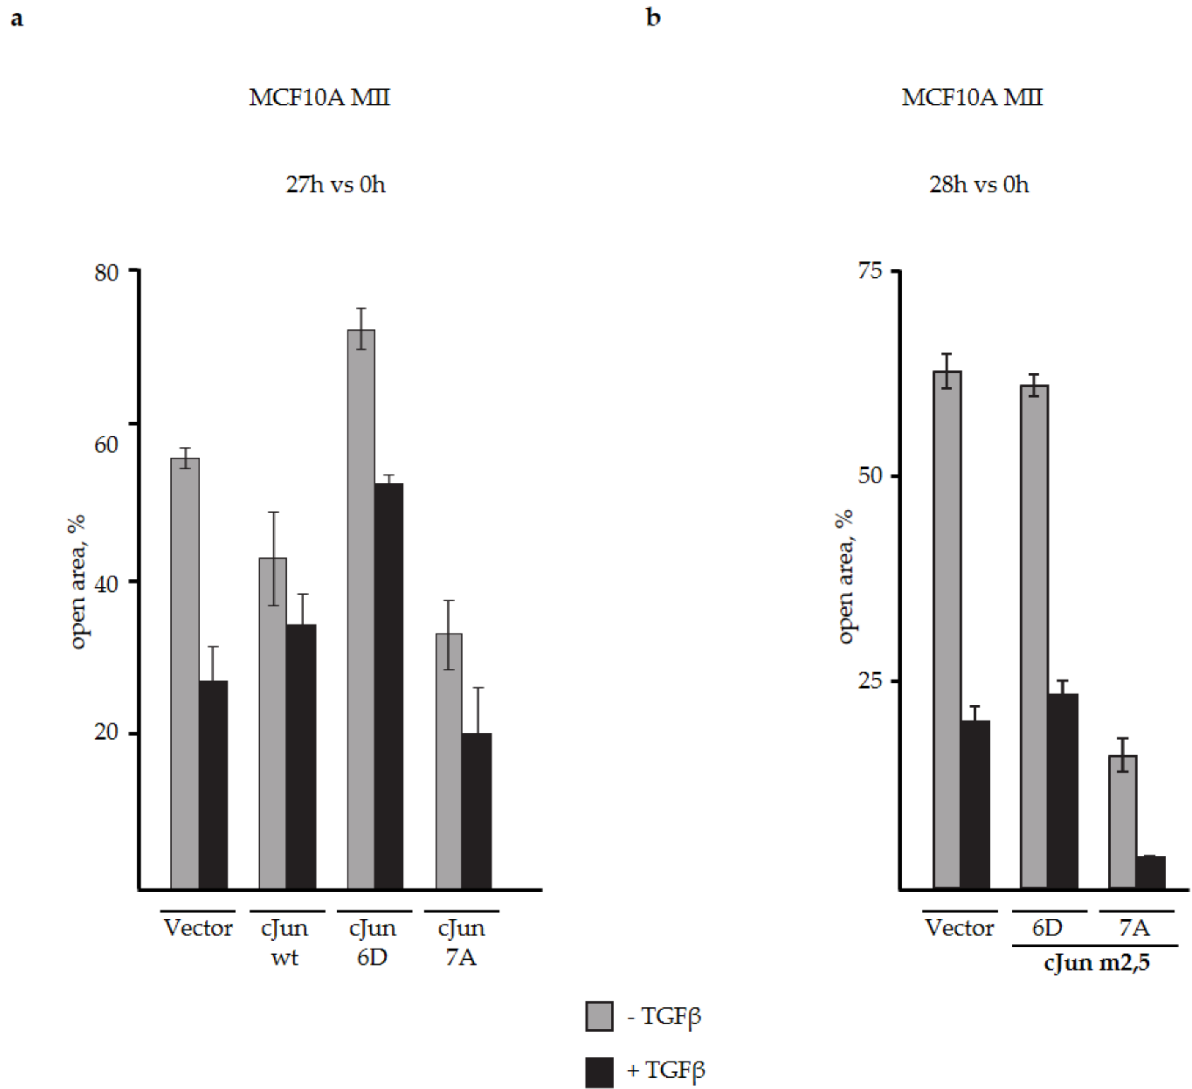

**Supplementary Figure S1** JNK-dependent cJun phosphorylation negatively affects MCF10A MII cell migration. **(a)** Migration of MCF10A MII cells stably overexpressing of wt cJun, and cJun-6D and cJun-7A mutants in the presence or absence of TGF $\beta$  (5 ng/ml) for 27 h, as measured by wound healing assays; **(b)** Migration of MCF10A MII cells stably overexpressing the HA-tagged Fos- (m2,5) preferring variants of cJun-6D and cJun-7A in the presence or absence of TGF $\beta$  (5 ng/ml) for 28 h, as measured by wound healing assays.

## Supplementary Figure S2

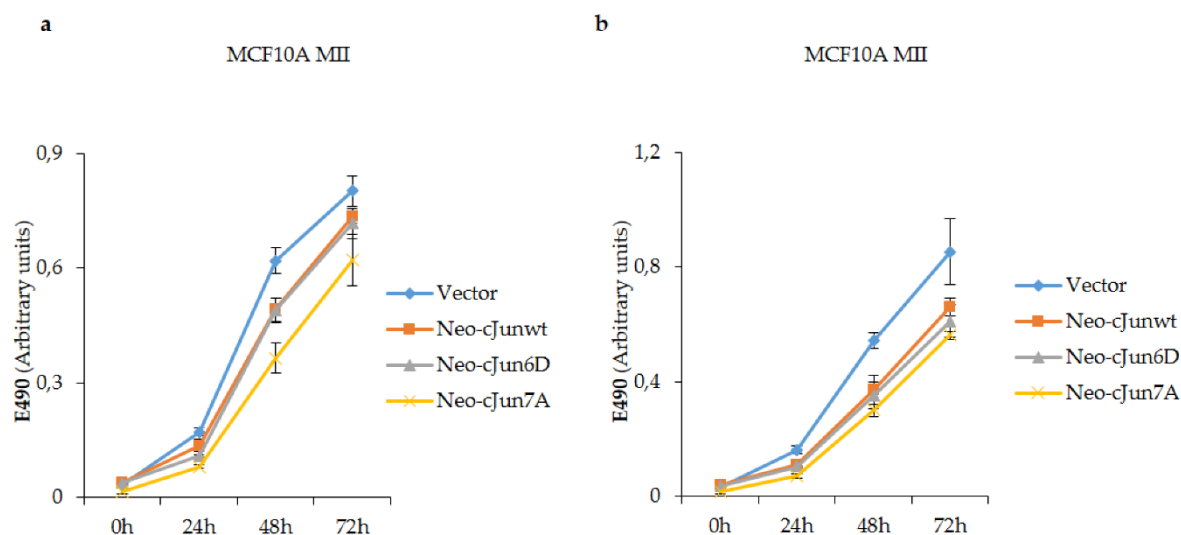

**Supplementary Figure S2.** MCF10A-MII cells expression ectopic cJun-7A did not show enhanced proliferation. **(a,b)** Proliferation of MCF10A-MII cells stably overexpressing wt cJun, cJun-6D, or cJun-7A, and the vector control, growing for the indicated times in complete media + 0,2%FBS (a), or in complete media + 0,2%FBS and 5ng/ml TGF $\beta$  (b). The assays were performed in triplicate using the CellTiter 96 AQueous One Solution Cell Proliferation Assay Kit from Promega.

**Supplementary Table S1.** Primer sequences for qRT-PCR

| Name                | Sequence                     |
|---------------------|------------------------------|
| <i>FLNA</i> FW      | 5'-CATCTGATGGACCAGCCTCTC-3'  |
| <i>FLNA</i> Rev     | 5'-GCAGTTGGCTGTTGATCTGC-3'   |
| <i>GAPDH</i> FW     | 5'-GGAGTCAACGGATTTGGTCGTA-3' |
| <i>GAPDH</i> Rev    | 5'-GGCAACAATATCCACTTTACCA-3' |
| <i>HBEGF</i> FW     | 5'-TCCTCTCGGTGCGGGACCAT-3'   |
| <i>HBEGF</i> Rev    | 5'-GTGCCGAGAGAACTGCAGCCAG-3' |
| <i>MMP1</i> FW      | 5'-CCAAATGGGCTTGAAGCT-3'     |
| <i>MMP1</i> Rev     | 5'-GTAGCACATTCTGTCCCTAA-3'   |
| <i>MMP2</i> FW      | 5'-AGATGCCTGGAATGCCAT-3'     |
| <i>MMP2</i> Rev     | 5'-GGTTCTCCAGCTTCAGGTAAT-3'  |
| <i>MMP10</i> FW     | 5'-CCCCTGGTGCCCAAAA-3'       |
| <i>MMP10</i> Rev    | 5'-TCACACTTGGCTGGCATCTC-3'   |
| <i>SERPINE1</i> FW  | 5'-GAGACAGGCAGCTCGGATTC-3'   |
| <i>SERPINE1</i> Rev | 5'-GGCCTCCCAAAGTGCATTAC-3'   |
| <i>WNT7A</i> FW     | 5'-TGCCCGGACTTCATGAAC-3'     |
| <i>WNT7A</i> Rev    | 5'-GTGTGGTCCAGCACGTCTTG-3'   |
| <i>WNT7B</i> FW     | 5'-AAGCTCGGAGCACTGTCATC-3'   |
| <i>WNT7B</i> Rev    | 5'-ACTGGTACTGGCACTCGTTG-3'   |
